# Supplementary material for: Factors Associated with Timing of Initiation of Antiretroviral Therapy among HIV-1 Infected Adults in the Niger Delta Region of Nigeria
Source: PubMed Central journal article supplement (PMC4416715; doi:10.1371/journal.pone.0125665), 2015-05-01
Supplement: pone.0125665.s003.pdf [file pone.0125665.s003.pdf]

## Means

[DataSet2] C:\Users\AllennellaLensMedia\Documents\Timing of ART\TIME TO INIATION OF AR Nigeria.sav

### Case Processing Summary

|                                                             | Cases    |         |          |         |       |         |
|-------------------------------------------------------------|----------|---------|----------|---------|-------|---------|
|                                                             | Included |         | Excluded |         | Total |         |
|                                                             | N        | Percent | N        | Percent | N     | Percent |
| AGE * Lost to follow up group                               | 280      | 100.0%  | 0        | 0.0%    | 280   | 100.0%  |
| Baseline CD4 cell count * Lost to follow up group           | 280      | 100.0%  | 0        | 0.0%    | 280   | 100.0%  |
| Baseline packed cell volume * Lost to follow up group       | 219      | 78.2%   | 61       | 21.8%   | 280   | 100.0%  |
| Baseline Creatinine clearance new * Lost to follow up group | 183      | 65.4%   | 97       | 34.6%   | 280   | 100.0%  |
| Fasting blood sugar * Lost to follow up group               | 172      | 61.4%   | 108      | 38.6%   | 280   | 100.0%  |

### Report

|                         |                | AGE   | Baseline CD4 cell count | Baseline packed cell volume | Baseline Creatinine clearance new |
|-------------------------|----------------|-------|-------------------------|-----------------------------|-----------------------------------|
| Lost to follow up group |                |       |                         |                             |                                   |
| LTFU                    | Mean           | 33.16 | 622.8542                | 34.6522                     | 88.7698                           |
|                         | N              | 96    | 96                      | 67                          | 56                                |
|                         | Std. Deviation | 9.996 | 206.47814               | 5.25796                     | 28.24422                          |
| Not LTFU                | Mean           | 32.72 | 587.9457                | 35.0908                     | 89.4979                           |
|                         | N              | 184   | 184                     | 152                         | 127                               |
|                         | Std. Deviation | 9.127 | 183.16068               | 4.71777                     | 30.13727                          |
| Total                   | Mean           | 32.87 | 599.9143                | 34.9566                     | 89.2751                           |
|                         | N              | 280   | 280                     | 219                         | 183                               |
|                         | Std. Deviation | 9.418 | 191.82472               | 4.88137                     | 29.49541                          |

**Report**

| Lost to follow up group |                | Fasting blood sugar |
|-------------------------|----------------|---------------------|
| LTFU                    | Mean           | 5.0463              |
|                         | N              | 54                  |
|                         | Std. Deviation | 1.75872             |
| Not LTFU                | Mean           | 4.9096              |
|                         | N              | 118                 |
|                         | Std. Deviation | 1.44139             |
| Total                   | Mean           | 4.9525              |
|                         | N              | 172                 |
|                         | Std. Deviation | 1.54410             |

**ANOVA Table**

|                                                             |                           | Sum of Squares | df  |
|-------------------------------------------------------------|---------------------------|----------------|-----|
| AGE * Lost to follow up group                               | Between Groups (Combined) | 12.150         | 1   |
|                                                             | Within Groups             | 24735.961      | 278 |
|                                                             | Total                     | 24748.111      | 279 |
| Baseline CD4 cell count * Lost to follow up group           | Between Groups (Combined) | 76876.528      | 1   |
|                                                             | Within Groups             | 10189409.41    | 278 |
|                                                             | Total                     | 10266285.94    | 279 |
| Baseline packed cell volume * Lost to follow up group       | Between Groups (Combined) | 8.944          | 1   |
|                                                             | Within Groups             | 5185.514       | 217 |
|                                                             | Total                     | 5194.458       | 218 |
| Baseline Creatinine clearance new * Lost to follow up group | Between Groups (Combined) | 20.602         | 1   |
|                                                             | Within Groups             | 158315.612     | 181 |
|                                                             | Total                     | 158336.215     | 182 |
| Fasting blood sugar * Lost to follow up group               | Between Groups (Combined) | .692           | 1   |
|                                                             | Within Groups             | 407.014        | 170 |
|                                                             | Total                     | 407.707        | 171 |

ANOVA Table

|                                                             |                |            | Mean Square | F     | Sig. |
|-------------------------------------------------------------|----------------|------------|-------------|-------|------|
| AGE * Lost to follow up group                               | Between Groups | (Combined) | 12.150      | .137  | .712 |
|                                                             | Within Groups  |            | 88.978      |       |      |
|                                                             | Total          |            |             |       |      |
| Baseline CD4 cell count * Lost to follow up group           | Between Groups | (Combined) | 76876.528   | 2.097 | .149 |
|                                                             | Within Groups  |            | 36652.552   |       |      |
|                                                             | Total          |            |             |       |      |
| Baseline packed cell volume * Lost to follow up group       | Between Groups | (Combined) | 8.944       | .374  | .541 |
|                                                             | Within Groups  |            | 23.896      |       |      |
|                                                             | Total          |            |             |       |      |
| Baseline Creatinine clearance new * Lost to follow up group | Between Groups | (Combined) | 20.602      | .024  | .878 |
|                                                             | Within Groups  |            | 874.672     |       |      |
|                                                             | Total          |            |             |       |      |
| Fasting blood sugar * Lost to follow up group               | Between Groups | (Combined) | .692        | .289  | .591 |
|                                                             | Within Groups  |            | 2.394       |       |      |
|                                                             | Total          |            |             |       |      |

Relationship between study variables and lost to follow up status

|                                     |               | Lost to follow up group |               |          |
|-------------------------------------|---------------|-------------------------|---------------|----------|
|                                     |               | LTFU                    |               | Not LTFU |
|                                     |               | Count                   | Row Valid N % | Count    |
| SEX                                 | MALE          | 32                      | 38.6%         | 51       |
|                                     | FEMALE        | 64                      | 32.5%         | 133      |
| MARITAL STATUS                      | EVER MARRIED  | 48                      | 29.8%         | 113      |
|                                     | NEVER MARRIED | 38                      | 39.2%         | 59       |
| HIV stage at presentation           | STAGE 1       | 45                      | 33.1%         | 91       |
|                                     | STAGE 2       | 50                      | 35.0%         | 93       |
| Baseline CD4 GROUP                  | 350-500       | 30                      | 28.6%         | 75       |
|                                     | >500          | 66                      | 37.7%         | 109      |
| Baseline CREATININE CLEARANCE group | >90MLS/MIN    | 25                      | 33.3%         | 50       |
|                                     | <90MLS/MIN    | 31                      | 28.7%         | 77       |

**Relationship between study variables and lost to follow up status**

|                                        |               | Lost to follow up group |       |                  |
|----------------------------------------|---------------|-------------------------|-------|------------------|
|                                        |               | Not LTFU                | Total |                  |
|                                        |               | Row Valid N<br>%        | Count | Row Valid N<br>% |
| SEX                                    | MALE          | 61.4%                   | 83    | 100.0%           |
|                                        | FEMALE        | 67.5%                   | 197   | 100.0%           |
| MARITAL STATUS                         | EVER MARRIED  | 70.2%                   | 161   | 100.0%           |
|                                        | NEVER MARRIED | 60.8%                   | 97    | 100.0%           |
| HIV stage at presentation              | STAGE 1       | 66.9%                   | 136   | 100.0%           |
|                                        | STAGE 2       | 65.0%                   | 143   | 100.0%           |
| Baseline CD4 GROUP                     | 350-500       | 71.4%                   | 105   | 100.0%           |
|                                        | >500          | 62.3%                   | 175   | 100.0%           |
| Baseline CREATININE<br>CLEARANCE group | >90MLS/MIN    | 66.7%                   | 75    | 100.0%           |
|                                        | <90MLS/MIN    | 71.3%                   | 108   | 100.0%           |

**Pearson Chi-Square Tests**

|                                        |            | Lost to follow<br>up group |
|----------------------------------------|------------|----------------------------|
| SEX                                    | Chi-square | .954                       |
|                                        | df         | 1                          |
|                                        | Sig.       | .329                       |
| MARITAL STATUS                         | Chi-square | 2.387                      |
|                                        | df         | 1                          |
|                                        | Sig.       | .122                       |
| HIV stage at presentation              | Chi-square | .109                       |
|                                        | df         | 1                          |
|                                        | Sig.       | .741                       |
| Baseline CD4 GROUP                     | Chi-square | 2.435                      |
|                                        | df         | 1                          |
|                                        | Sig.       | .119                       |
| Baseline CREATININE<br>CLEARANCE group | Chi-square | .447                       |
|                                        | df         | 1                          |
|                                        | Sig.       | .504                       |

Results are based on nonempty rows and columns in each innermost subtable.
